# Supplementary material for: Feasibility and cross-cultural validation of an adapted social skills group training programme (KONTAKT TM CHILD) for Chinese autistic children: a waitlist RCT protocol
Source: HighWire-hosted journal article supplement (doi:10.1136/bmjopen-2023-081827), 2024-11-01
Supplement: bmjopen-2023-081827supp001_data_supplement.pdf [file bmjopen-2023-081827supp001_data_supplement.pdf]

Title:Feasibility and cross-cultural validation of an adapted social skills group training programme (KONTAKT™ CHILD) for Chinese autistic children: a wait-list RCT protocol

1

2

# Online Supplemental File 1: Structure and Content of the Chinese version of KONTAKT™

3

4

Supplementary Table 1. Comparison between the KONTAKT™ CHILD and Mandarin PEERS® for autistic children and adolescents.

| Category                                  |                                                                                        | KONTAKT™ CHILD                                                                                             | Mandarin PEERS®[1]                                                                                                 |
|-------------------------------------------|----------------------------------------------------------------------------------------|------------------------------------------------------------------------------------------------------------|--------------------------------------------------------------------------------------------------------------------|
| Participant characteristics               | Age range (in years)                                                                   | 8-12                                                                                                       | 12-17                                                                                                              |
|                                           | Intelligence quotient (IQ)                                                             | Full-scale IQ over 70                                                                                      | Full-scale as well as verbal IQ over 70                                                                            |
|                                           | Adequate Chinese comprehension                                                         | Required                                                                                                   | Required                                                                                                           |
|                                           | Self-reported intrinsic motivation to participate                                      | Required                                                                                                   | Required                                                                                                           |
|                                           | No significant rule-breaking or self-harm behaviours                                   | Required                                                                                                   | Required                                                                                                           |
| General group and session characteristics | Number of participant sessions                                                         | 16                                                                                                         | 14                                                                                                                 |
|                                           | Number of parent sessions                                                              | 3                                                                                                          | 14                                                                                                                 |
|                                           | Group size                                                                             | 4-8                                                                                                        | 6-10                                                                                                               |
|                                           | Per session length                                                                     | 1 hour                                                                                                     | 1.5 hour                                                                                                           |
|                                           | Number of therapists per training group                                                | 2-3 group leaders                                                                                          | 3 group leaders for the adolescent session and 1 for the parent session                                            |
| Session structures and parent involvement | Participant session structure                                                          | Structured, with various sections including group activities and snack times                               | Structured, with the main focus being the didactic section                                                         |
|                                           | Participant-led sessions, individualised topics, and individually tailored assignments | Yes                                                                                                        | No                                                                                                                 |
|                                           | Excursion session for skill generalisation                                             | Yes                                                                                                        | No                                                                                                                 |
|                                           | Parent session structure                                                               | Focus on the overall progress of participants and group; parental support                                  | Focus on homework review and parental coaching techniques                                                          |
|                                           | Parent involvement                                                                     | Less emphasised, parents are encouraged to support their children throughout the programme                 | More emphasised, and successful parent coaching is considered as elemental in promoting positive training outcomes |
|                                           | Teaching methods                                                                       | Scaffold type teaching                                                                                     | Didactic teaching                                                                                                  |
|                                           |                                                                                        |                                                                                                            |                                                                                                                    |
| Overall goals and guiding principle       | Overall goals                                                                          | Individualised social goals developed with participants, self understanding plus emotional recognition and | Social skills necessary for developing and maintaining friendships and managing peer conflict and peer             |

Title:Feasibility and cross-cultural validation of an adapted social skills group training programme (KONTAKT™ CHILD) for Chinese autistic children: a wait-list RCT protocol

|  |                   |                                                                             |                                                                                              |
|--|-------------------|-----------------------------------------------------------------------------|----------------------------------------------------------------------------------------------|
|  |                   | expression goals                                                            | rejection                                                                                    |
|  | Guiding principle | Cognitive behavior therapy (CBT), with special focus on functional analysis | CBT, especially focus on psychoeducation, role-play demonstration, and behavioural rehearsal |

Title:Feasibility and cross-cultural validation of an adapted social skills group training programme (KONTAKT™ CHILD) for Chinese autistic children: a wait-list RCT protocol

6    **Supplementary Table 2. Content for the Chinese 16-session version of KONTAKT™.**

| Session | Participants         | Group activities                                                                    | Discussion topics                                                                                                                                                                                                                                                                           | Homework                                                                                  |
|---------|----------------------|-------------------------------------------------------------------------------------|---------------------------------------------------------------------------------------------------------------------------------------------------------------------------------------------------------------------------------------------------------------------------------------------|-------------------------------------------------------------------------------------------|
| 1       | Children and parents | I am good at...                                                                     | <p>Presentation of KONTAKT™, review of confidentiality.</p> <p><i>Advanced Option.</i></p> <p>How to introduce yourself.</p> <p>Parent meeting: Presentation of KONTAKT™, Understanding autism, developing child’s strengths, and <u>talking about autism diagnosis with your child</u></p> | Formulation of individual goals.                                                          |
| 2       | Children             | <p>Spin the bottle</p> <p><i>Optional.</i></p> <p><u>Story Cube</u><sup>a</sup></p> | <p>Group rules</p> <p><i>Advanced Option.</i></p> <p>How do I ‘describe’ myself in the group?    How do I ‘describe’ the others in the group?</p>                                                                                                                                           | <p>My supporters during KONTAKT™</p> <p>Practising one of the child’s midway goals</p>    |
| 3       | Children             | <p>What has changed?</p> <p><i>Optional.</i></p>                                    | <p><u>What kind of child am I?</u><sup>a</sup></p> <p><i>Advanced Option.</i></p> <p><u>Sharing my social</u></p>                                                                                                                                                                           | A difficult situation at school, for example, when the child became angry at a classmate. |

Title:Feasibility and cross-cultural validation of an adapted social skills group training programme (KONTAKT™ CHILD) for Chinese autistic children: a wait-list RCT protocol

| Session | Participants | Group activities                                                                                             | Discussion topics                                                                                                                       | Homework                               |
|---------|--------------|--------------------------------------------------------------------------------------------------------------|-----------------------------------------------------------------------------------------------------------------------------------------|----------------------------------------|
|         |              | The Wink game                                                                                                | <u>difficulties with others.</u> <sup>a</sup>                                                                                           |                                        |
| 4       | Children     | EU-Emotion<br><br><i>Optional.</i><br><br><u>Role-play, for example, conflict.</u> <sup>b</sup>              | How do gestures and facial expressions work?<br><br><i>Advanced Option.</i><br><br>When do you use non-verbal communication?            | Misunderstandings.<br><br>Children     |
| 5       | Children     | <u>Role-play focusing on complex emotions.</u> <sup>b</sup><br><br><i>Optional.</i><br><br>What has changed? | Resolving misunderstandings.<br><br><i>Advanced Option.</i><br><br>Understand jokes, irony, and sarcasm, and tell white lies.           | Starting a conversation                |
| 6       | Children     | Treasure Hunt<br><br><b>Optional.</b><br><br><u>Role-play</u> <sup>b</sup>                                   | How to manage a new social situation?<br><br><i>Advanced Option.</i><br><br>How can you support someone else in a new social situation? | Feeling lonely or not part of a group. |

Title:Feasibility and cross-cultural validation of an adapted social skills group training programme (KONTAKT™ CHILD) for Chinese autistic children: a wait-list RCT protocol

| Session | Participants         | Group activities                                                                                      | Discussion topics                                                                                                                                                                                                        | Homework                                                                                                                                     |
|---------|----------------------|-------------------------------------------------------------------------------------------------------|--------------------------------------------------------------------------------------------------------------------------------------------------------------------------------------------------------------------------|----------------------------------------------------------------------------------------------------------------------------------------------|
| 7       | Children             | Talking to a stranger<br><br><b>Optional.</b><br><br>EU Emotion                                       | Feeling lonely and being teased and/or bullied.<br><br><i>Advanced Option.</i><br><br>Managing difficult situations on social media.                                                                                     | Handling meeting cancellations or rejections.<br><br>Reviewing main and midway goals.                                                        |
| 8       | Children and parents | <u>Charades</u> <sup>b</sup><br><br><b>Optional.</b><br><br>The Wink game                             | Choose a task to do during an excursion.<br><br><i>Advanced Option.</i><br><br>Talking to someone you like or want to be friends with.<br><br>Parent meeting:<br><br>Update on what has been covered on KONTAKT™ so far. | Prepare for the group excursion.<br><br>Individualised home assignments based on chosen tasks to be undertaken while on the group excursion. |
| 9       | Children             | Group excursion, e.g., to a cafe, <u>bubble tea shop</u> , <u>or convenience store</u> . <sup>a</sup> | What to consider when going on an excursion?                                                                                                                                                                             | Carrying out my task during the excursion.                                                                                                   |
| 10      | Children             | <u>Video clip about non-verbal communication</u> . <sup>b</sup>                                       | Making/Canceling a time to meet up with someone                                                                                                                                                                          | Talking to someone new or I do not know.                                                                                                     |

Title:Feasibility and cross-cultural validation of an adapted social skills group training programme (KONTAKT™ CHILD) for Chinese autistic children: a wait-list RCT protocol

| Session | Participants         | Group activities                                                                           | Discussion topics                                                                                                                                                      | Homework                                                     |
|---------|----------------------|--------------------------------------------------------------------------------------------|------------------------------------------------------------------------------------------------------------------------------------------------------------------------|--------------------------------------------------------------|
|         |                      | <b>Optional.</b><br><br>Spin the bottle                                                    | <b>Advanced Option.</b><br><br>How to stay in touch with a friend                                                                                                      |                                                              |
| 11      | Children             | Joint group activity<br><br><b>Optional.</b><br><u>Advanced treasure hunt</u> <sup>b</sup> | Connecting with a person you do not know well<br><br><b>Advanced Option.</b><br><br>Connecting through social media                                                    | Individualised homework assignments based on personal goals. |
| 12-15   | Children             | Chosen by the selected Children.                                                           | Chosen by the selected Children.                                                                                                                                       | Individualised homework assignments based on personal goals. |
| 16      | Children and parents | Jointly determined by the group                                                            | Reflection on what it was like to lead a KONTAKT™ session. Summarising the programme<br><br>Parent meeting:<br><br>Update on what has been covered on KONTAKT™ so far. | -                                                            |

<sup>a</sup>: Topics or scenarios different from the Australian English version of KONTAKT™ [2].

<sup>b</sup>: Activities that have been localised to match the Chinese culture.

Title:Feasibility and cross-cultural validation of an adapted social skills group training programme (KONTAKT™ CHILD) for Chinese autistic children: a wait-list RCT protocol

7  
8  
9  
10

11   **References**

12   1. Lao U, Li Y, Bai W, et al. Adaptation and Feasibility of the Mandarin Version of PEERS((R)) for Autistic  
13       Adolescents. J Autism Dev Disord 2023 <https://doi.org/10.1007/s10803-023-06056-w>. Epub  
14       2023/07/22 21:06.

15   2. Girdler S, Afsharnejad B, Black MH, et al. KONTAKT® Manual English version. Australia2021.

16
